# Supplementary material for: Gut Microbiota-Associated Activation of TLR5 Induces Apolipoprotein A1 Production in the Liver
Source: PubMed Central journal article supplement — Circ Res. 2020 Aug 21;127(10):1236–52. doi: 10.1161/CIRCRESAHA.120.317362 (PMC7580858; doi:10.1161/circresaha.120.317362), 2020-08-21
Supplement: res-127-1236-s002.pdf [file res-127-1236-s002.pdf]

# Full unedited blots for Figure 1

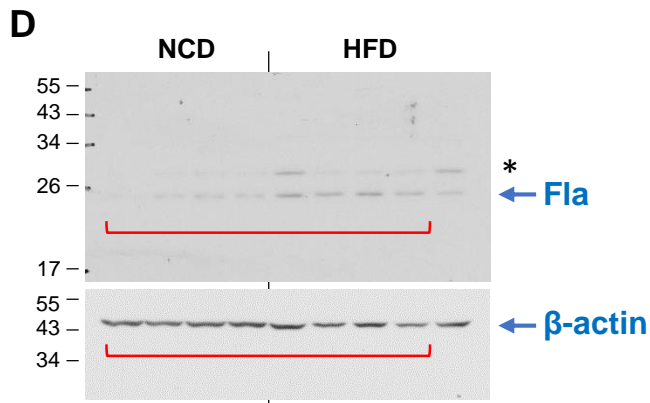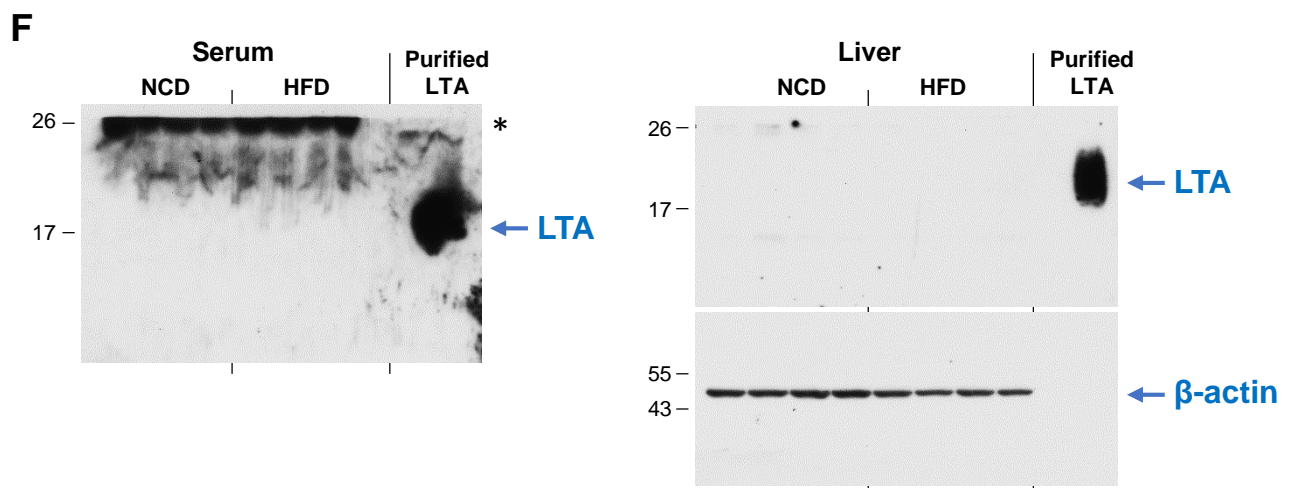

\* non-specific bands;  
Red brackets indicate the bands shown in the manuscript.

## Full unedited blots for Figure 2

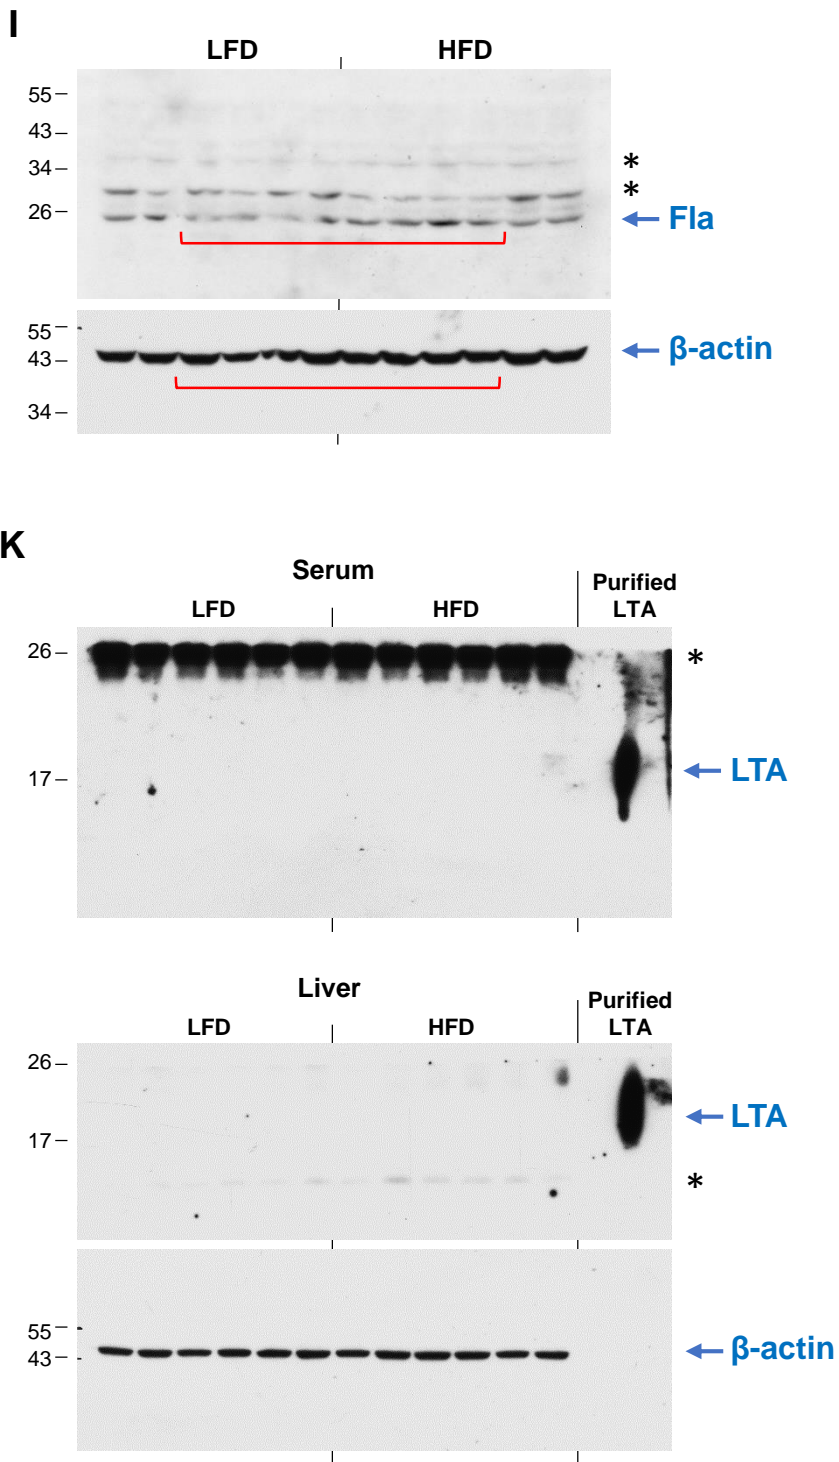

\* non-specific bands;

Red brackets indicate the bands shown in the manuscript.

## Full unedited blots for Figure 3

**B**

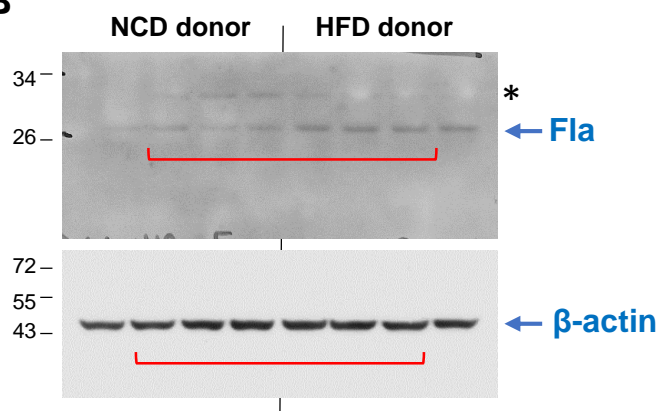

\* non-specific band;

Red brackets indicate the bands shown in the manuscript.

## Full unedited blots for Figure 4

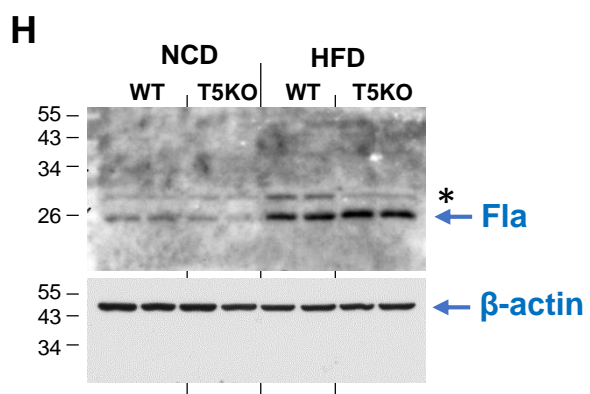

## Full unedited blots for Figure 5

**B**

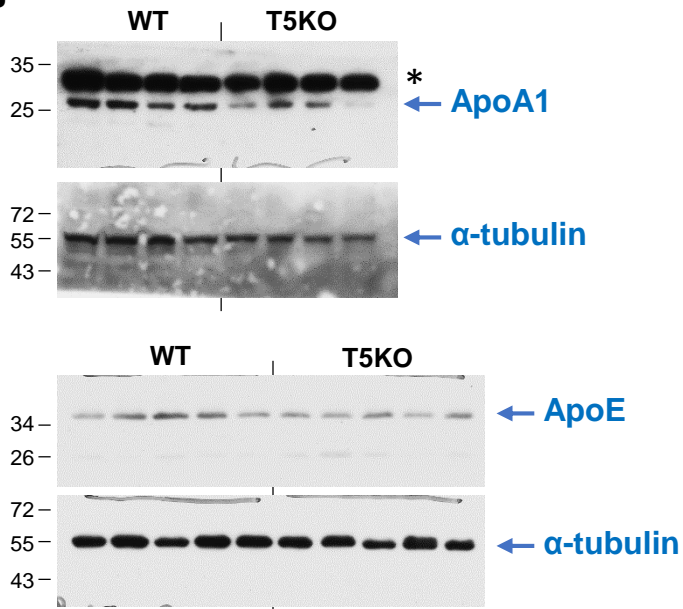

**D**

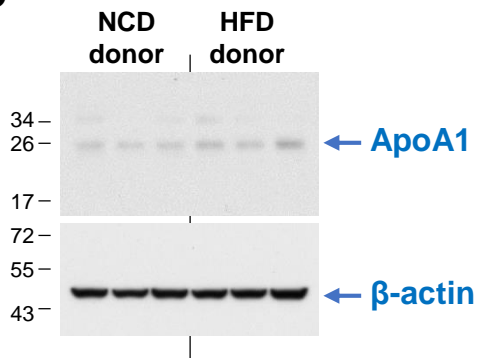

**G**

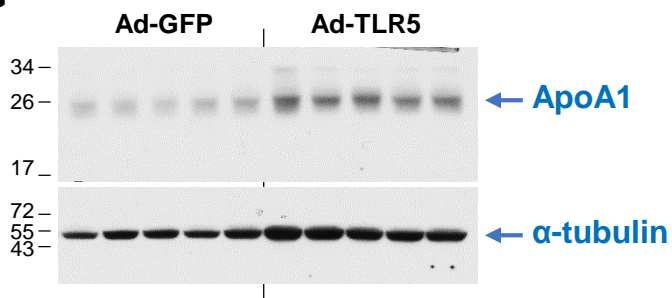

\* non-specific band

Full unedited blots for Figure 6

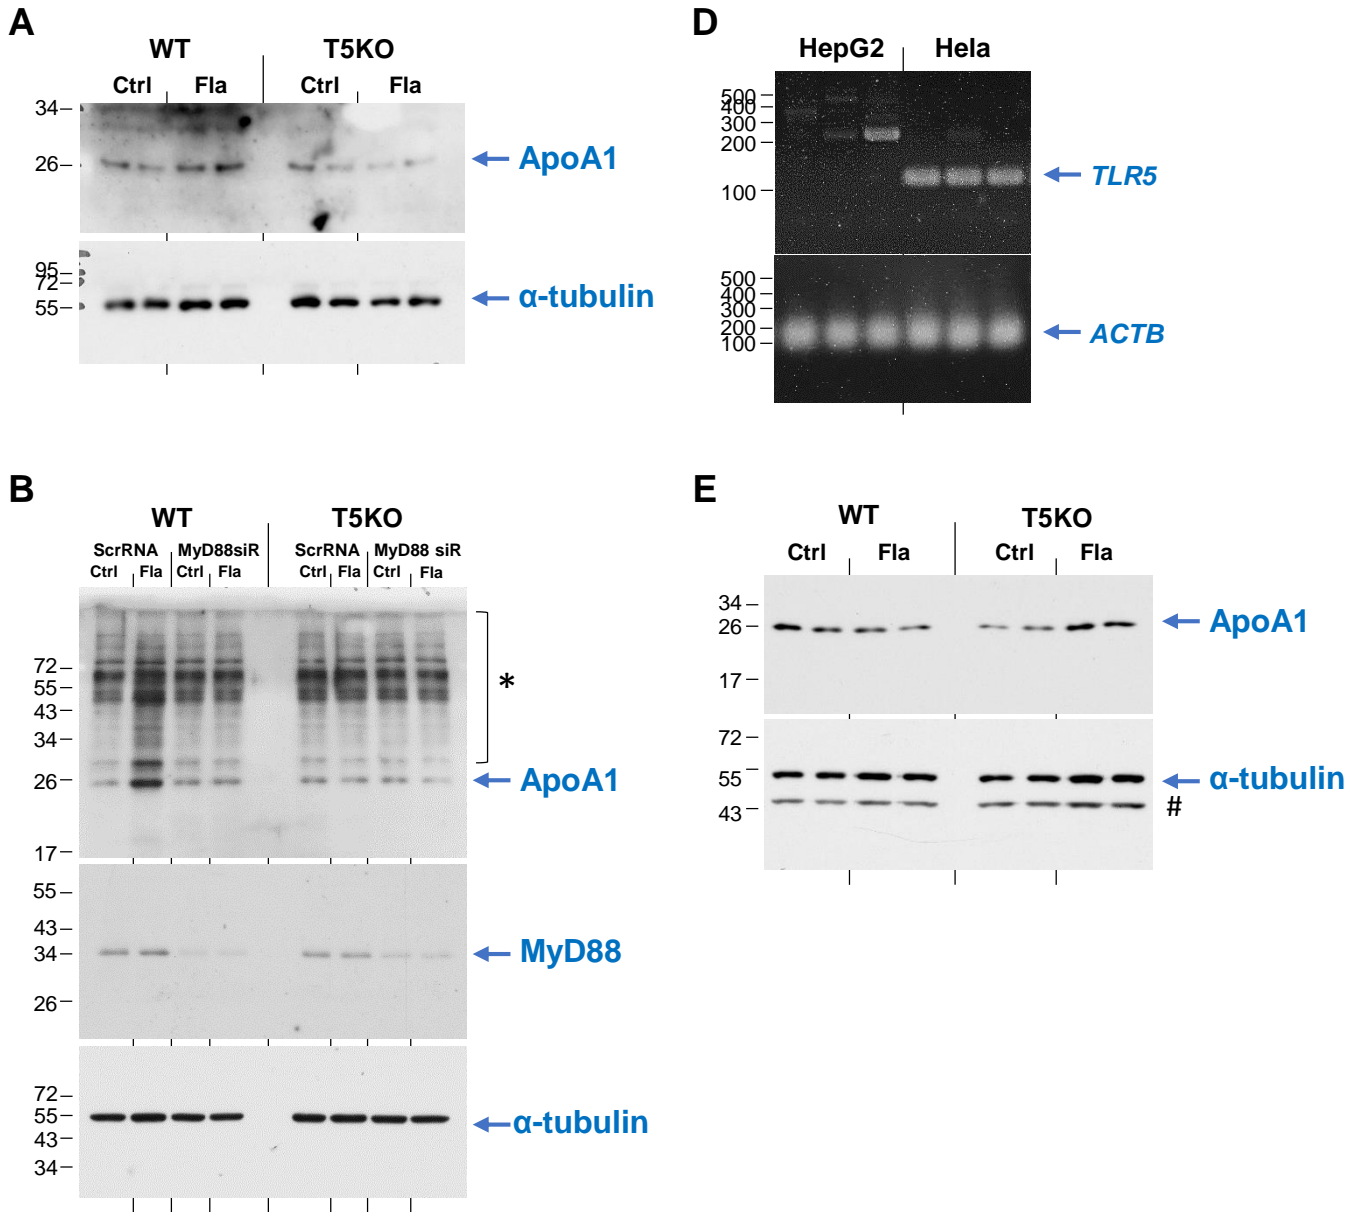

\* non-specific bands;  
# residue after stripping

## Full unedited blots for Figure 7

**B**

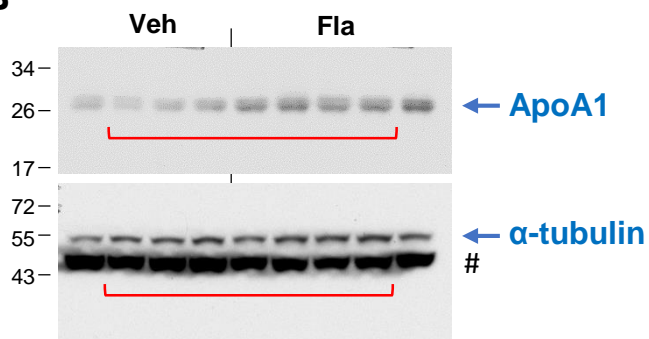

**D**

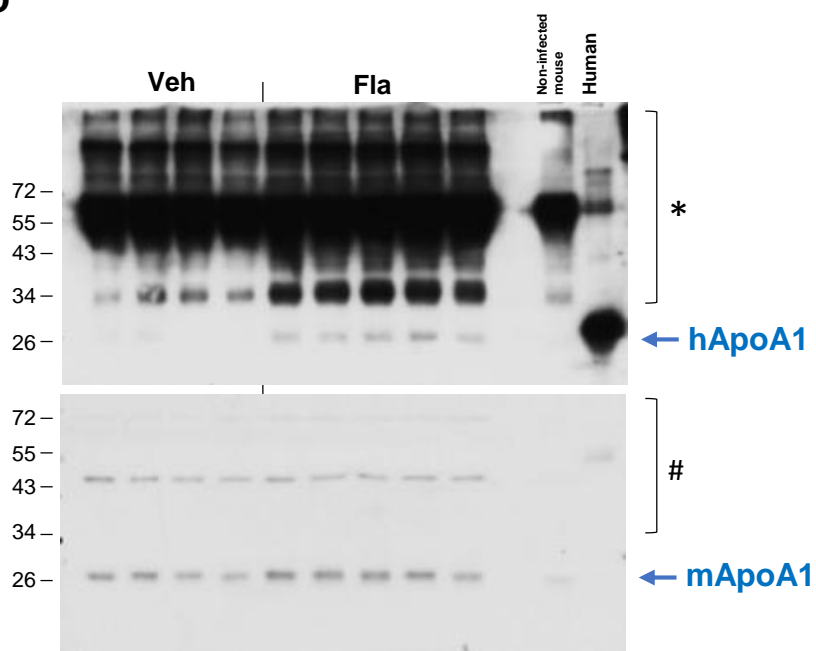

\* non-specific bands;

# residue after stripping;

Red brackets indicate the bands shown in the manuscript.

Full unedited blots for Figure 8

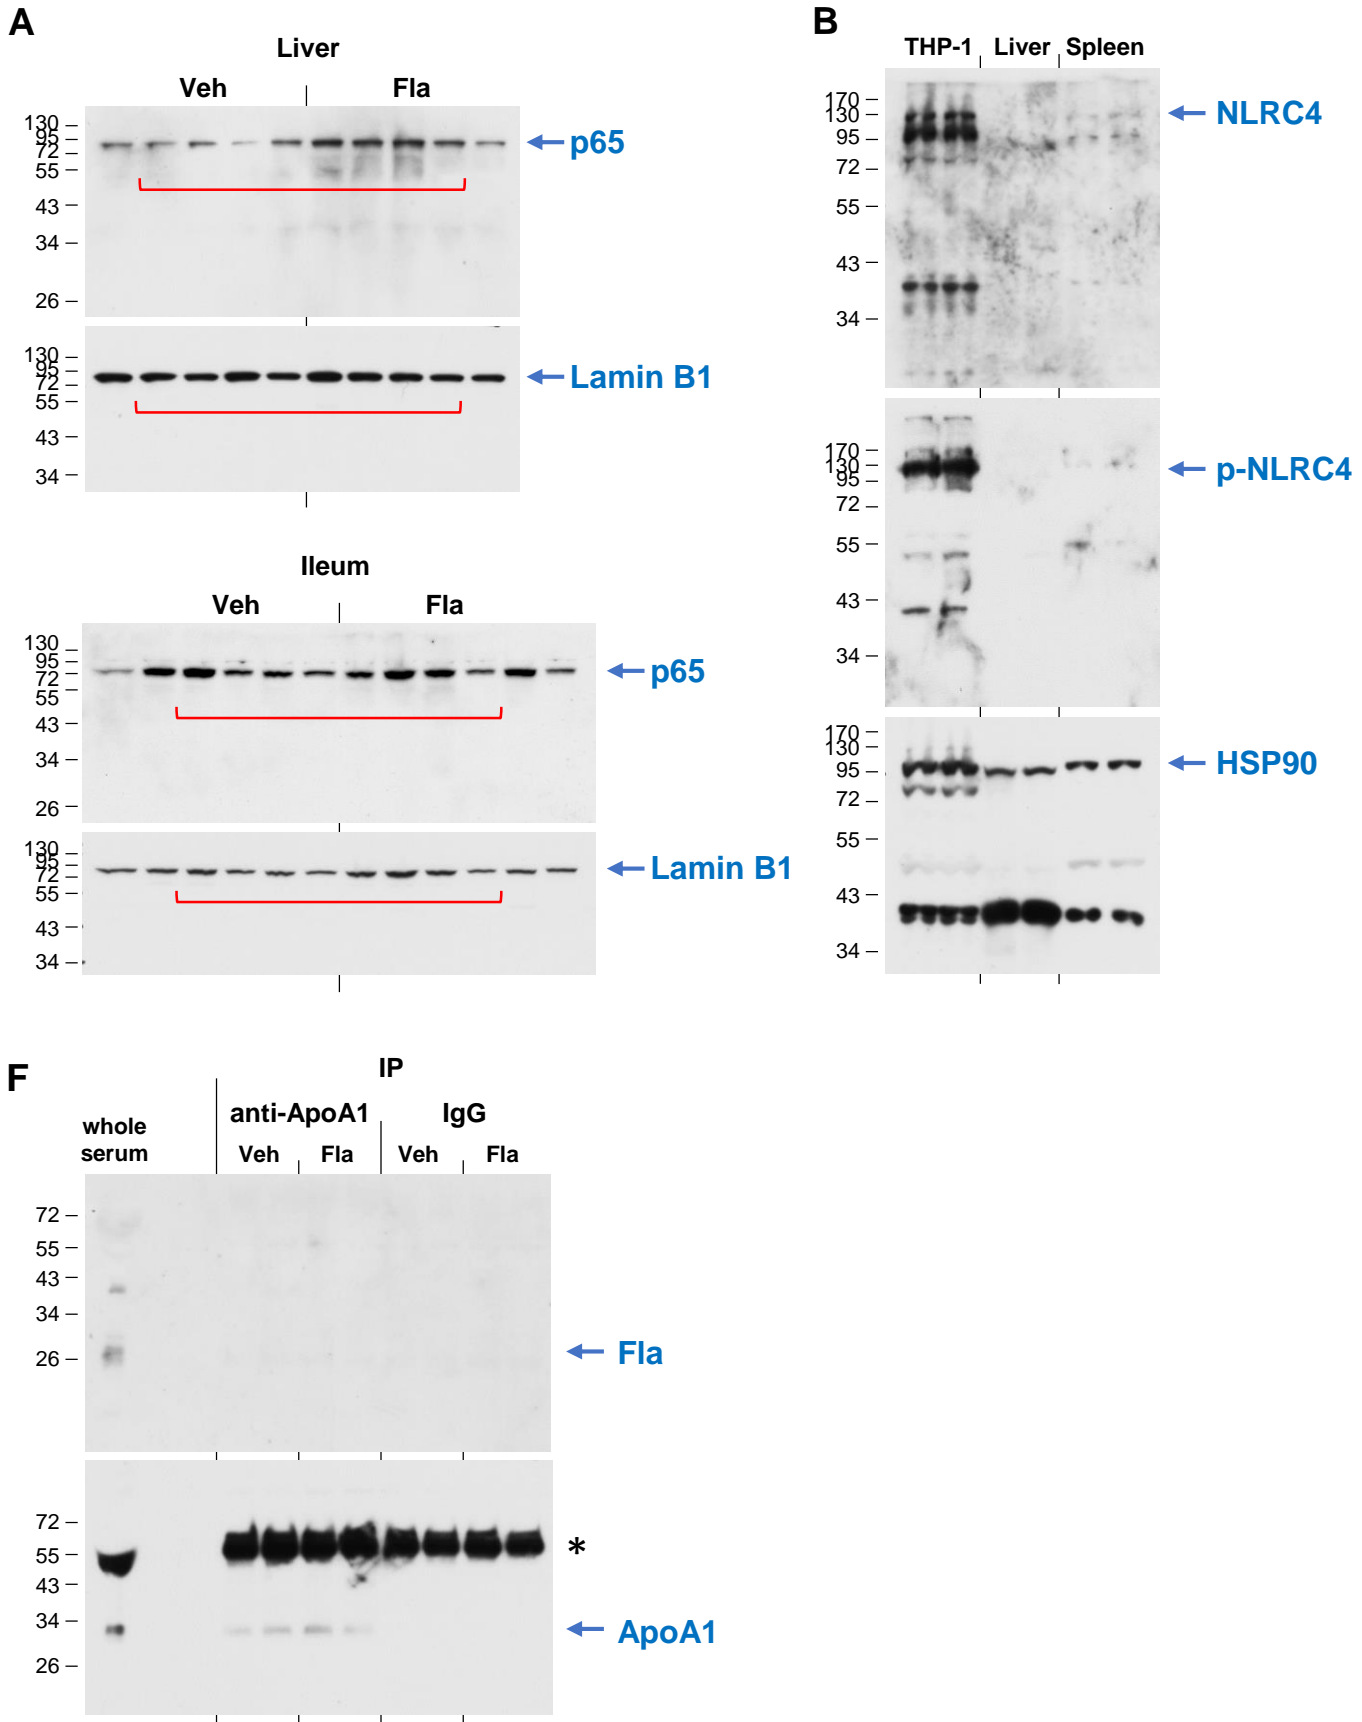

\* non-specific band;

Red brackets indicate the bands shown in the manuscript.



# Full unedited blots for Online Figure II

**B**

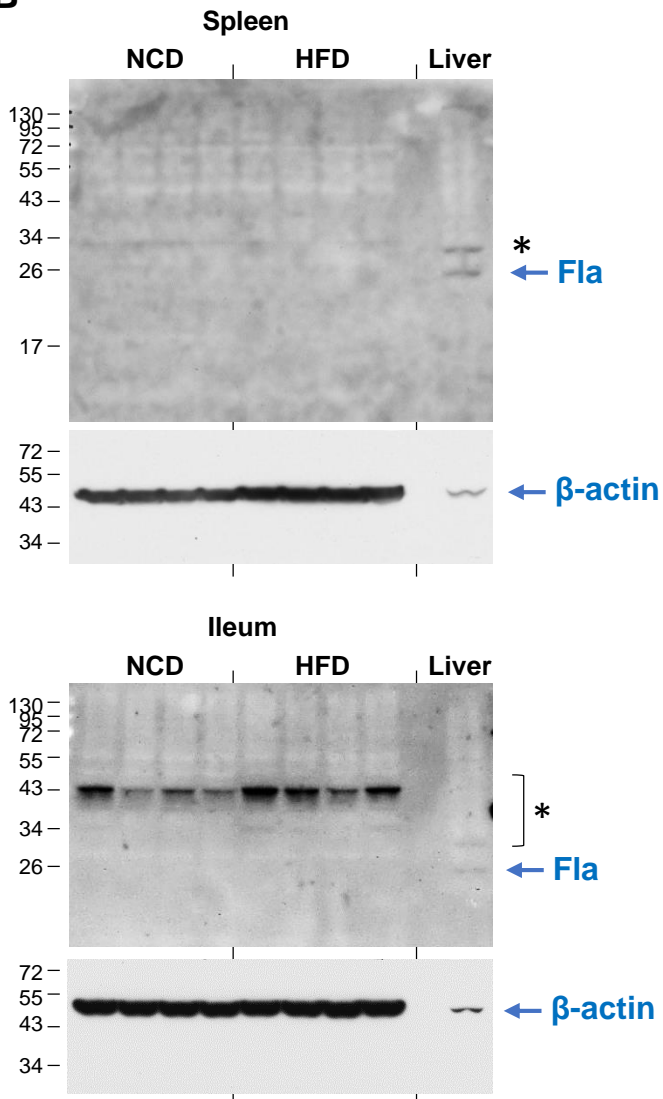

\* non-specific bands

# Full unedited blots for Online Figure III

**E**

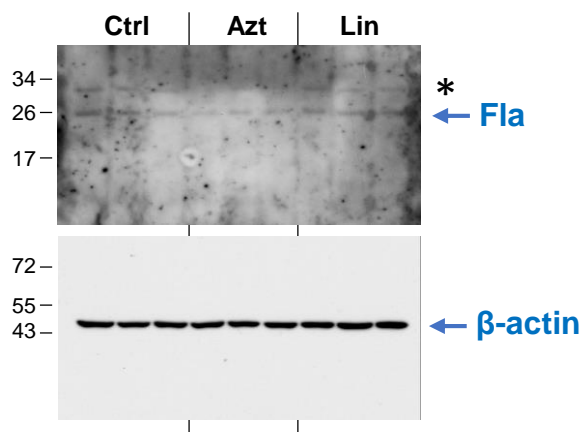

\* non-specific bands

## Full unedited blots for Online Figure V

**B**

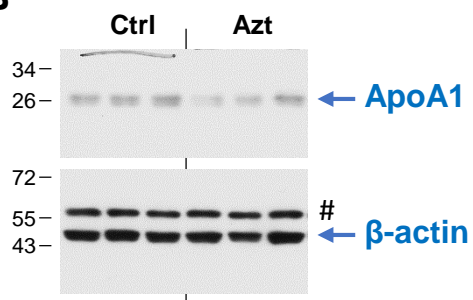

**D**

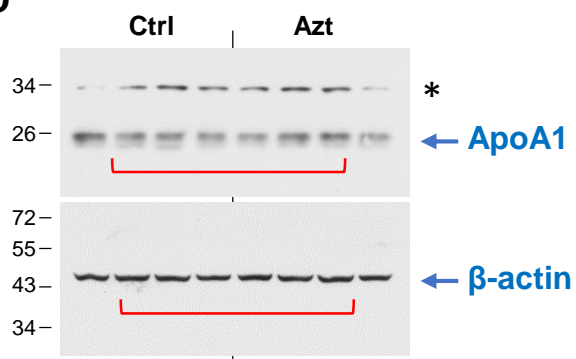

\* non-specific band;  
# residue after stripping;  
Red brackets indicate the bands shown in the manuscript.

# Full unedited blots for Online Figure VI

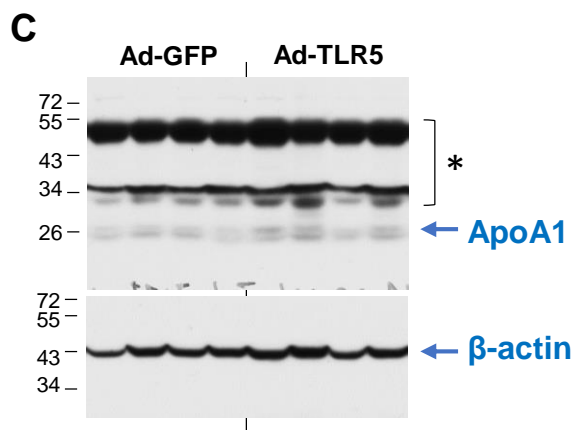

\* non-specific bands

## Full unedited blots for Online Figure VII

**B**

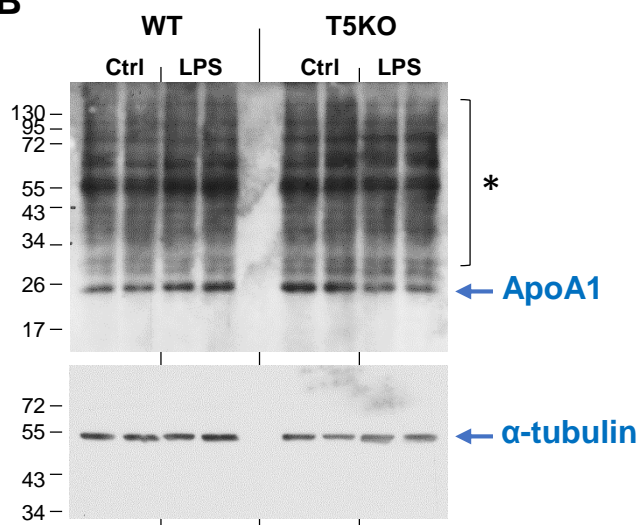

**C**

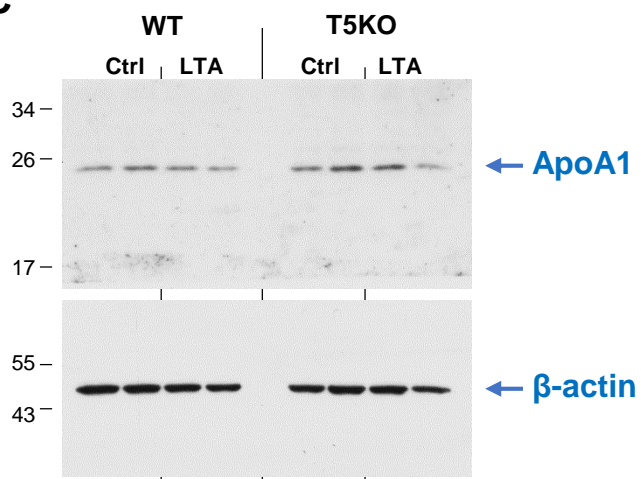

\* non-specific bands

Full unedited blots for Online Figure X

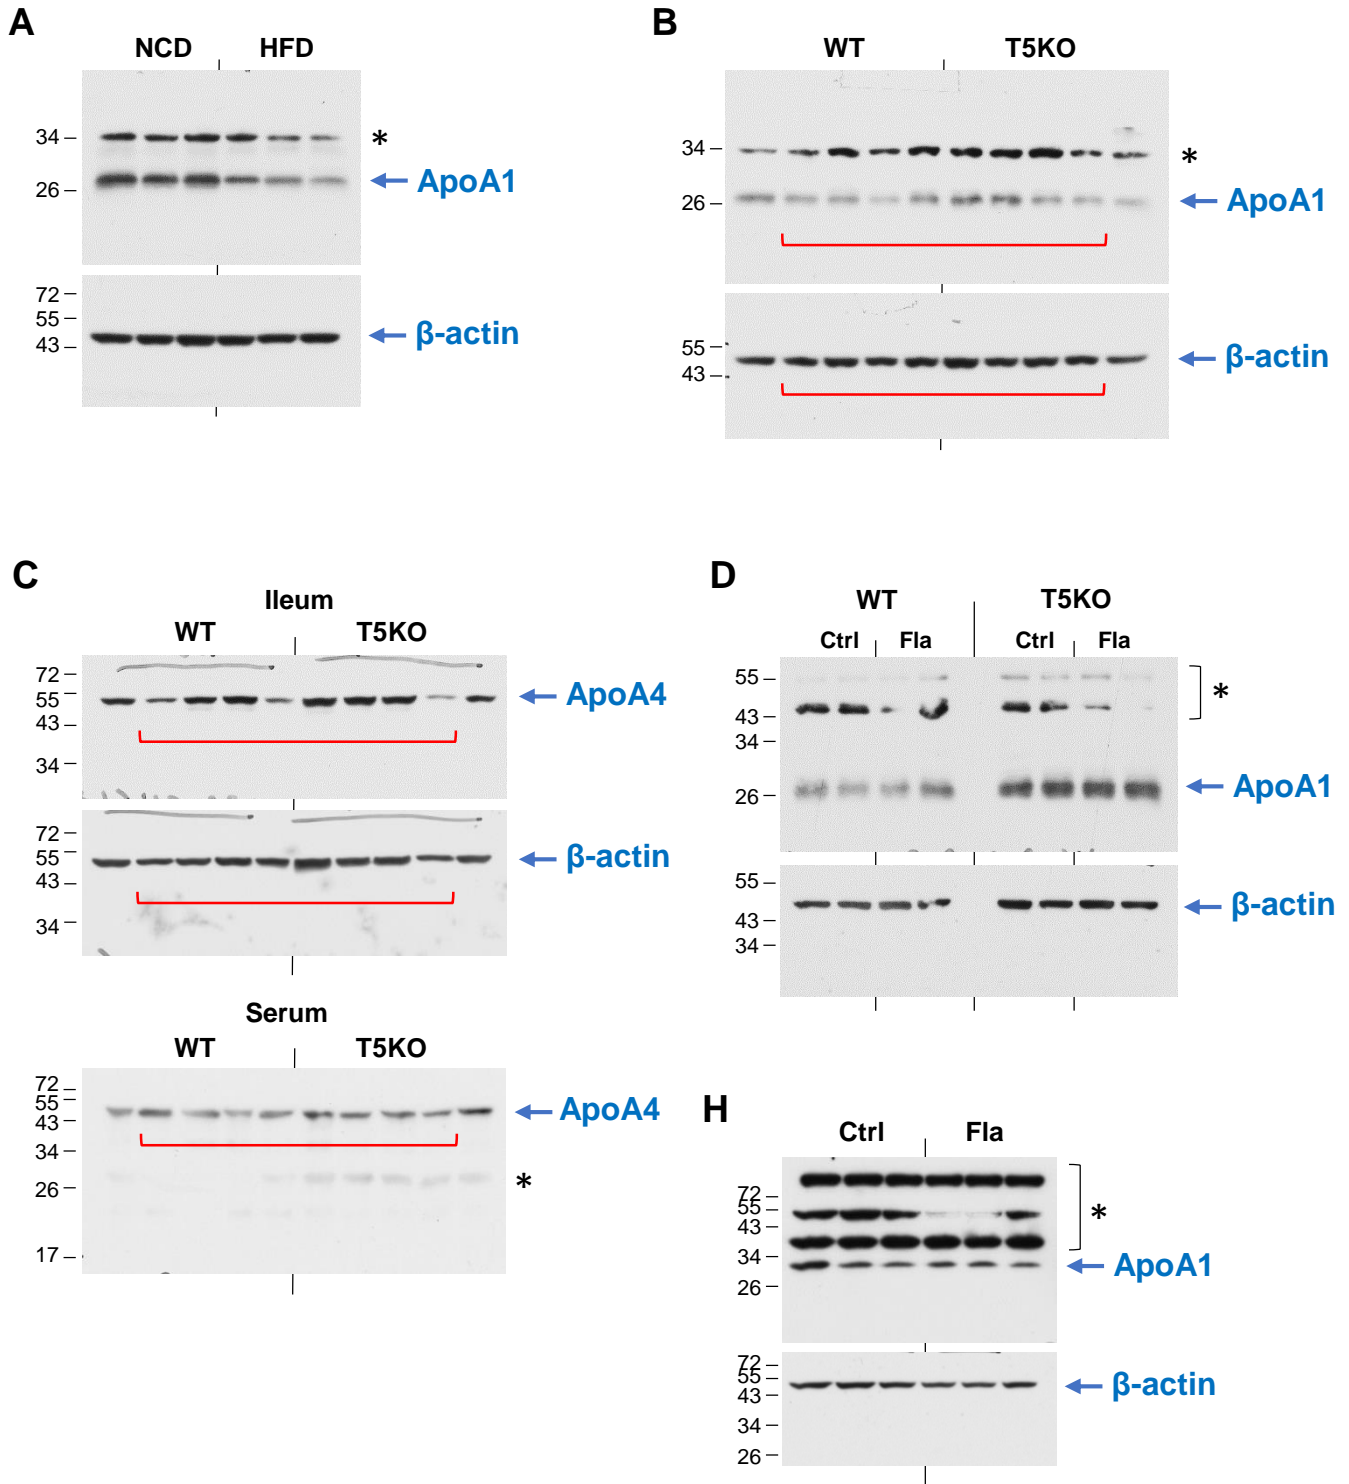

\* non-specific bands;  
Red brackets indicate the bands shown in the manuscript.

## Full unedited blots for Online Figure XI

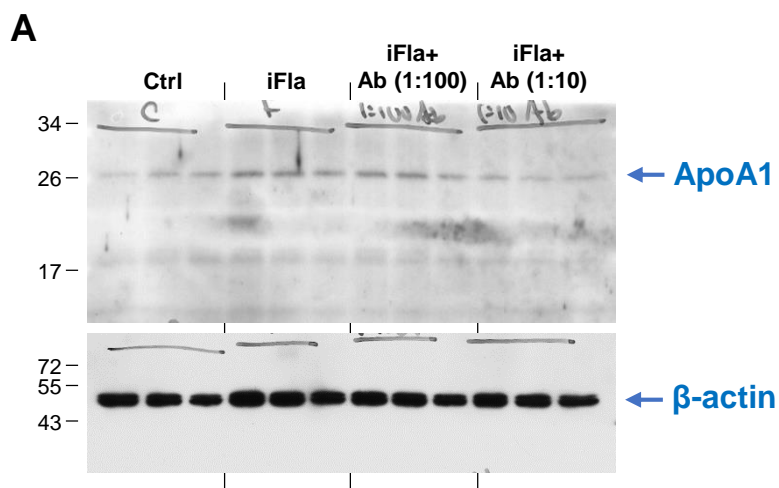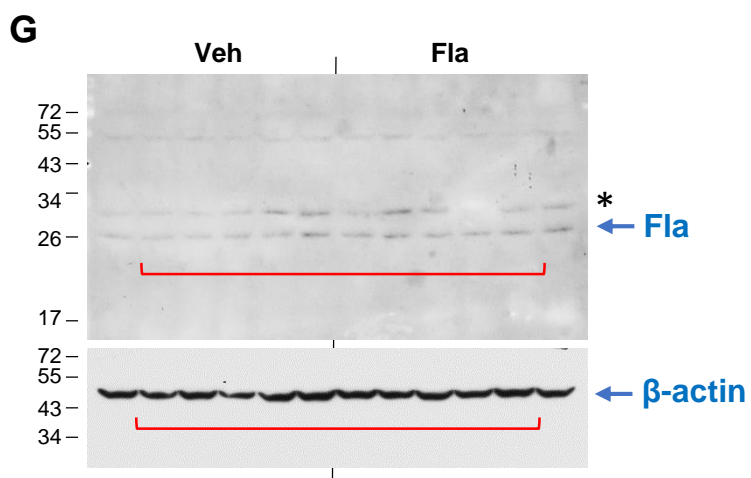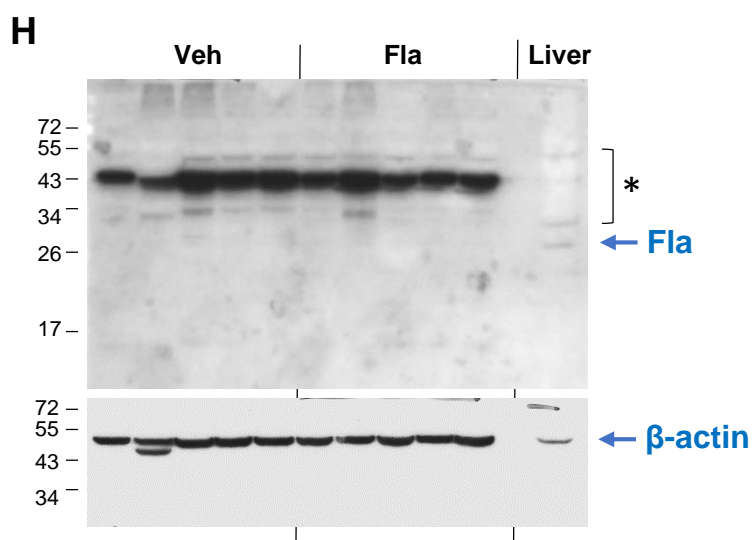

\* non-specific bands;

Red brackets indicate the bands shown in the manuscript.

## Full unedited blots for Online Figure XIV

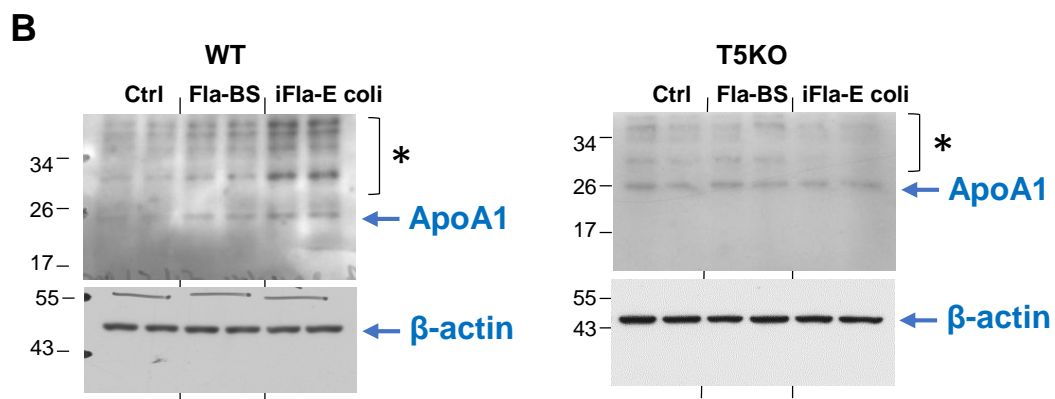

\* non-specific bands;

Red brackets indicate the bands shown in the manuscript.
